# Supplementary material
Source: PubMed Central journal article supplement (PMC3784212)
Supplement: cei0174-0045-SD1.pdf [file cei0174-0045-SD1.pdf]

All 5' to 3'

| Gene                                                 | Forward                | Reverse                  |
|------------------------------------------------------|------------------------|--------------------------|
| <i>ACTB</i> ( $\beta$ -actin)<br>(housekeeping gene) | CATGTACGTTGCTATCCAGGC  | CTCCTTAATGTCACGCACGAT    |
| <i>COX2</i>                                          | CCCTCAGACAGCAAAGCCTA   | GTTTTGACATGGGTGGGAAC     |
| <i>PDL-1</i>                                         | TGCTTGTCAGATGACTTCG    | TATGGTGGTGCCGACTACAA     |
| <i>TGF<math>\beta</math></i>                         | GGACATCAACGGGTTCCTACC  | AGCAGGAAAGGCCGGTTC       |
| <i>S100A9</i>                                        | GGAATTCAAAGAGCTGGTGC   | TCAGCATGATGAACTCCTCG     |
| <i>C/EBP-<math>\beta</math></i>                      | CCACGGCCACGGACACCTTCG  | GCGCGGCCTCCCTGCTCTGA     |
| <i>HES1</i>                                          | CGGCTAAGGTGTTTGAG      | GCTGTTGCTGGTGTAGAC       |
| <i>NOX2</i>                                          | CCATCCGGAGGTCTTACTTTGA | ACGTACAATTCGTTTCAGCTCCAT |
| <i>ARG1</i>                                          | ATTGTTCCGTTCTTCTTGACTT | AGTGTGATGTGAAGGATTATG    |
| <i>IDO</i>                                           | GGCACACGCTATGGAAAAT    | TCAGGCAGATGTTTAGCAATG    |
| <i>STAT3</i>                                         | ACCTGCAGCAATACCATTGAC  | AAGGTGAGGGACTCAAATGC     |

**Supplemental Table S1. Primer sequences for qRT-PCR**

| <b>Gene</b>                | <i>β-actin</i> | <i>ARG-1</i> | <i>COX2</i> | <i>C/EBPβ</i> | <i>HES-1</i> | <i>IDO</i> | <i>NOX2</i> | <i>PDL1</i> | <i>STAT3</i> | <i>S100/A9</i> | <i>TGF-β</i> |
|----------------------------|----------------|--------------|-------------|---------------|--------------|------------|-------------|-------------|--------------|----------------|--------------|
| <b>C<sub>t</sub> value</b> | 16.30          | 21.90        | 24.75       | 23.99         | 30.19        | 34.04      | 21.75       | 33.16       | 23.58        | 14.90          | 22.57        |

**Supplemental Table S2. RNA expression of MDSC related genes**

Quantitative RT-PCR was performed in MACS-isolated Gr-MDSCs. C<sub>t</sub> values of the housekeeping gene β-actin and 10 established MDSC related genes are shown (higher C<sub>t</sub> value implies lower gene expression).

**Supplemental Figure S1**

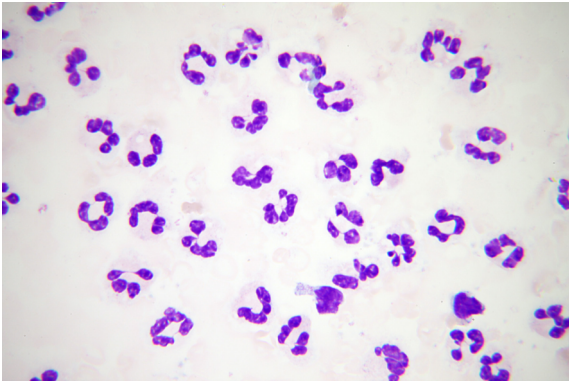

**Conventional PMN**

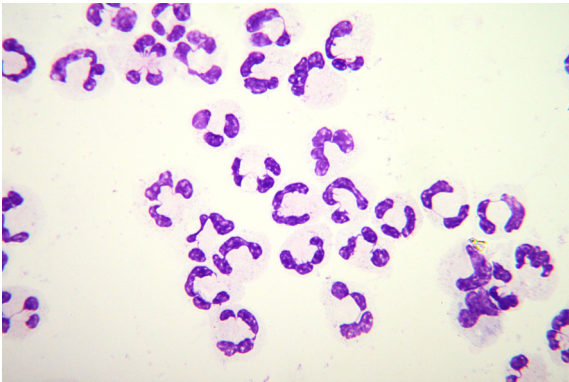

**Adult Gr-MDSC**

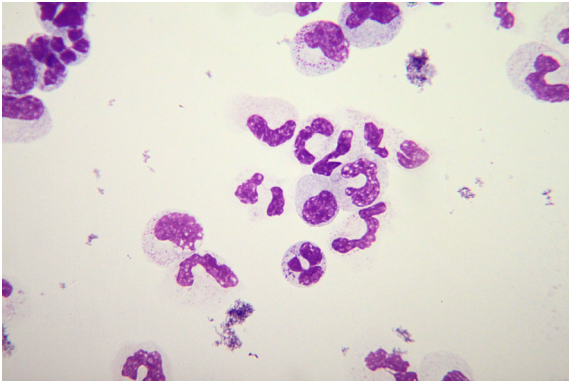

**Cord blood Gr-MDSC**

Supplemental Figure S2

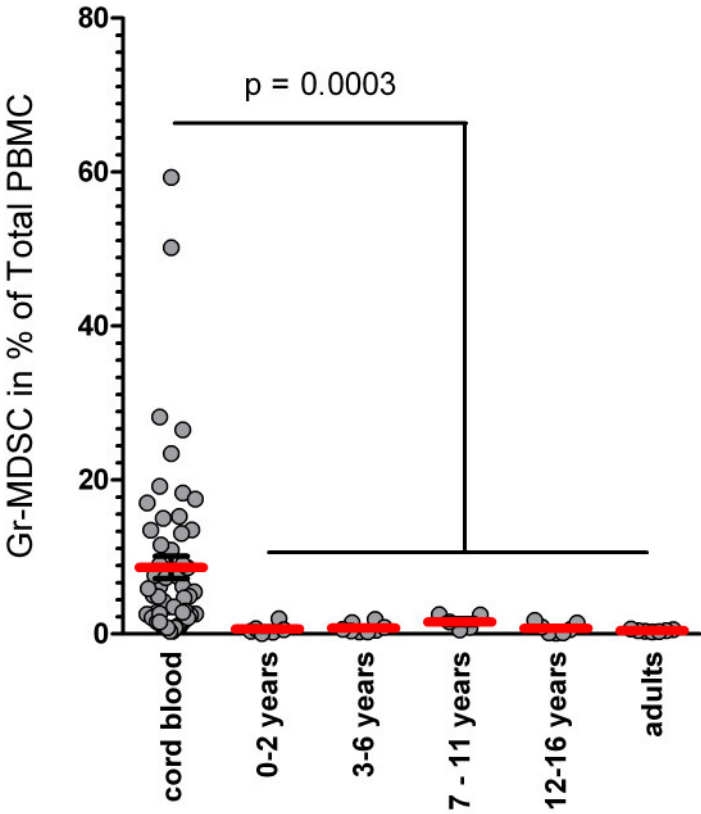

Supplemental Figure S3

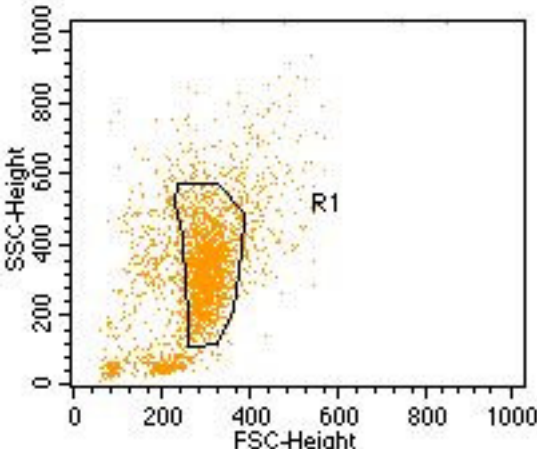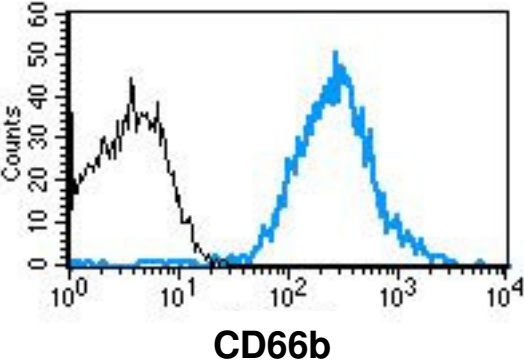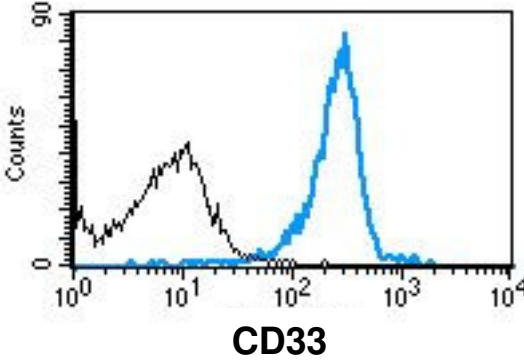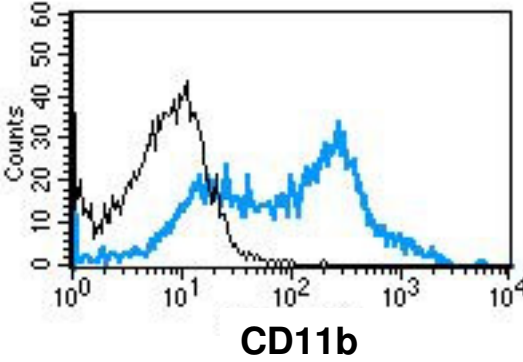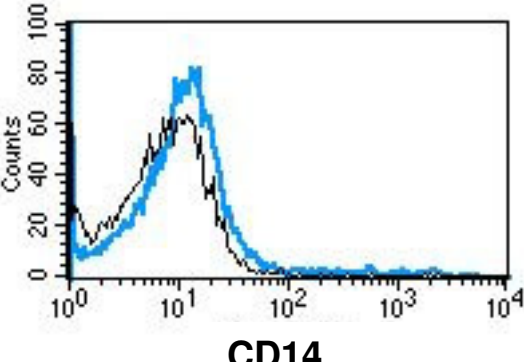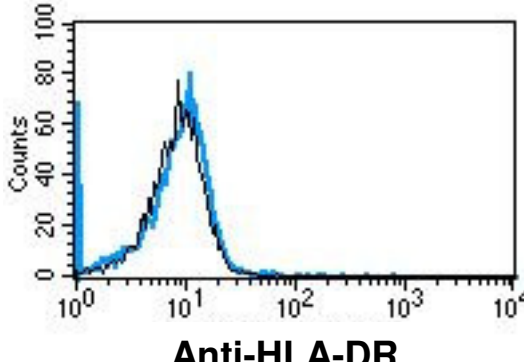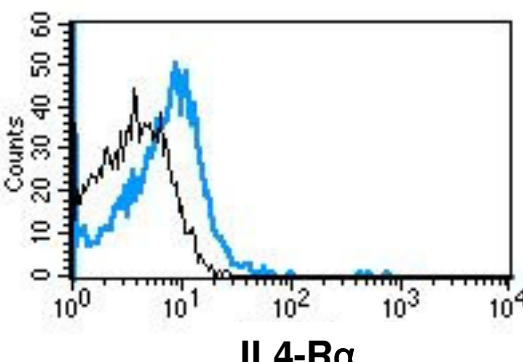

Supplemental Figure S4

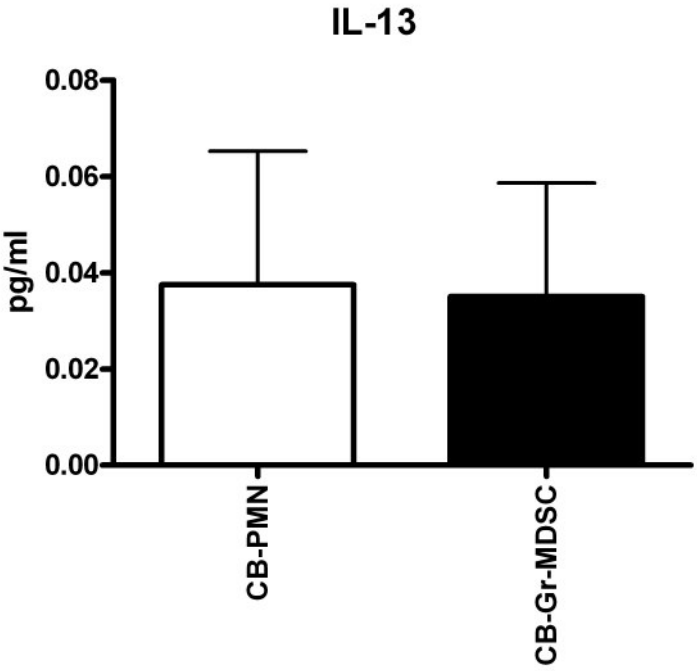

## **SUPPLEMENTARY FIGURE LEGENDS**

### **FIGURE S1. Cytospins of Gr-MDSCs**

Isolated neutrophils or Gr-MDSCs were fixed with cytospin centrifugation and stained with May-Gruenwald-Giemsa-stain. Images were acquired on a Carl Zeiss Fotomicroscope (40x Planapo oil objective, Carl Zeiss) using Canon EOS 500 camera (Canon) and Adobe Photoshop CS3 software (Adobe).

### **FIGURE S2. Gr-MDSCs in cord blood and different age groups**

Linear scale illustration of human Gr-MDSC numbers in cord blood and different age groups of healthy children and adults

### **FIGURE S3. Immunophenotyping of MACS-isolated human cord blood Gr-MDSCs**

The immunophenotype of MACS-isolated cord blood Gr-MDSCs is CD66b<sup>high</sup>CD33<sup>high</sup>CD11b<sup>high</sup>IL-4R $\alpha$ <sup>inter</sup>HLA-DR<sup>neg</sup>CD14<sup>neg</sup>. Representative histograms are shown.

### **FIGURE S4. IL-13 secretion of MACS-isolated human cord blood PMN and Gr-MDSCs**

IL-13 quantification was performed in culture supernatants of MACS-isolated human cord blood PMN and Gr-MDSCs cultured over 4 days in complete medium using standard ELISA technique.
